# Supplementary material
Source: ML conference proceedings conference paper supplement (https://openreview.net/forum?id=cARFM6KKlE)
Supplement: supplementary_material [file attachment]

|              | Person                                                                              | Mask                                                                                | CFG = 1.0                                                                           | CFG = 3.0                                                                           | CFG = 5.0                                                                            | CFG = 7.0                                                                             | CFG = 10.0                                                                            |
|--------------|-------------------------------------------------------------------------------------|-------------------------------------------------------------------------------------|-------------------------------------------------------------------------------------|-------------------------------------------------------------------------------------|--------------------------------------------------------------------------------------|---------------------------------------------------------------------------------------|---------------------------------------------------------------------------------------|
| SDXL-evolved |     |     |     |     |     |     |     |
| SDXL-INP-0.1 |    |    |    |    |    |    |    |
| SDXL-evolved |    |    |    |    |    |    |    |
| SDXL-INP-0.1 |   |   |   |   |   |   |   |
| SDXL-evolved |  |  |  |  |  |  |  |
| SDXL-INP-0.1 |  |  |  |  |  |  |  |
| SDXL-evolved |  |  |  |  |  |  |  |
| SDXL-INP-0.1 |  |  |  |  |  |  |  |
